# Supplementary material for: The preparation of CuM/SiO2 (M = Bi, Mg, Mn) catalysts applied in ethynylation of formaldehyde for 1,4-butynediol synthesis: the positive interface effect of CuO and Bi2O3
Source: Royal Society of Chemistry journal article supplement (doi:10.1039/d4dt02616k), 2024-11-11
Supplement: d4dt02616k1.pdf [file d4dt02616k1.pdf]

Supplementary materials

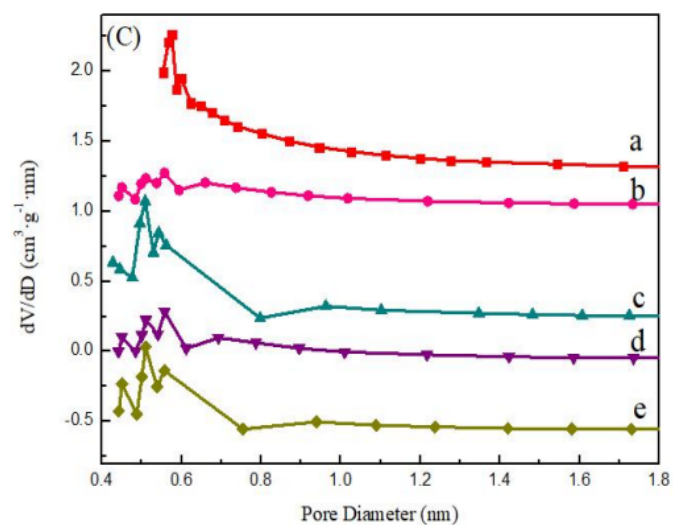

Fig.1s pore size distribution curve (microporous)

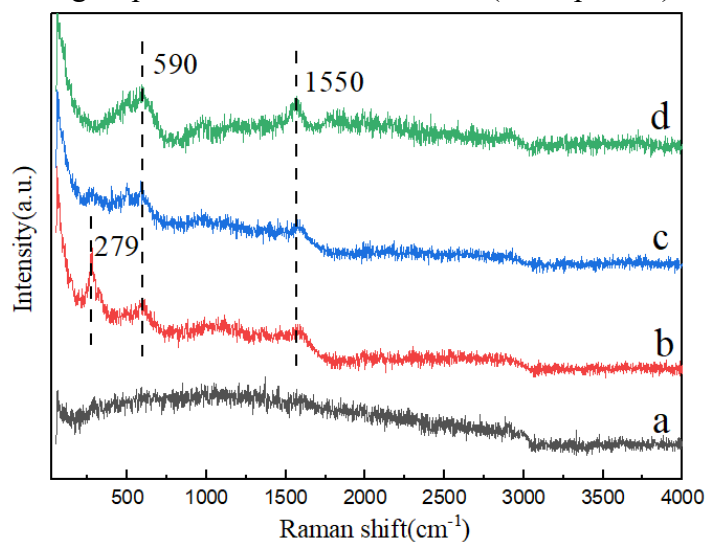

Fig.2s Raman spectra of catalysts (a) 30Cu/SiO<sub>2</sub>; (b) 30Cu<sub>2</sub>Bi/SiO<sub>2</sub>; (c) 30Cu<sub>2</sub>Mg/SiO<sub>2</sub>; (d) 30Cu<sub>2</sub>Mn/SiO<sub>2</sub>;
